# Supplementary material for: Effects of Different Pesticides on the Brewing of Wine Investigated by GC-MS-Based Metabolomics
Source: MDPI journal article supplement (doi:10.3390/metabo12060485), 2022-05-27
Supplement: s1 [file s1]

# Supporting information for: Effects of different pesticides on the brewing of wine investigated by GC-MS-based metabolomics

**Table S1.** Composition of the wine substances determined by GC-MS analysis.

| Metabolites                                             | VIP value | Mass | RT(min)  | p value         | FC(F)    | FC(H)           | FC(T)       | FC(D)           | FC(P)    |
|---------------------------------------------------------|-----------|------|----------|-----------------|----------|-----------------|-------------|-----------------|----------|
| acetic acid                                             | 1.35929   | 85   | 15.89187 | 0.001204        | -        | 1.218966        | 0.593212    | -               | -        |
| 1,2,3-Butanetriol                                       | 1.62937   | 117  | 27.23189 | 6.16E-05        | 6.474043 | ∞               | -           | -               | -        |
| 1,4-benzenediol                                         | 1.22356   | 478  | 30.1085  | 0.020174        | 2.648004 | 6.994054        | -           | 1.845059        | 2.630955 |
| 2-Ethyl-3-hydroxypropionic acid                         | 1.05116   | 72   | 17.9913  | 0.08617092<br>2 | 1.27479  | 1.68696485<br>9 | -           | -               | -        |
| Propanetriol                                            | 1.07307   | 292  | 18.8909  | 0.02736301<br>3 | -        | 1.96484302<br>9 | 1.669242327 | -               | 1.71384  |
| 2-[2-(4-Phenylpiperidin-1-yl)ethyl]-isoindole-1,3-dione | 1.17703   | 86   | 28.0162  | 0.08895155<br>2 | 0.54649  | 0.41170246<br>6 | 0.136044877 | 0.6393123<br>39 | 0.09313  |
| 2,3-Butanediol                                          | 1.27096   | 117  | 10.04971 | 0.001223        | 1.490856 | -               | 1.325844    | -               | -        |
| 2-Aminoheptanedioic acid                                | 1.6315    | 84   | 21.62158 | 0.000399        | -        | -               | -           | -               | 1.304041 |
| 1,4-benzenediol                                         | 1.22356   | 478  | 30.1085  | 0.0201737       | 2.648    | 6.99405405<br>9 | -           | 1.8450589<br>12 | 2.63095  |
| 2-Deoxyribose                                           | 1.41954   | 204  | 14.54985 | 0.000115        | -        | -               | 0.543394    | 0.795613        | 0.742132 |
| 2-Ethyl-3-hydroxypropionic acid                         | 1.05116   | 72   | 17.99125 | 0.086171        | 1.274785 | 1.686965        | -           | -               | -        |
| 2-Hydroxyglutaric acid                                  | 1.67877   | 85   | 18.5477  | 0.000184        | -        | -               | 0.333043    | 0.050698        | -        |
| 2-isoindole                                             | 1.17703   | 86   | 28.01617 | 0.088952        | 0.546491 | 0.411702        | 0.136045    | 0.639312        | 0.093128 |
| 2-Isopropylmalic acid                                   | 1.1965    | 73   | 19.44863 | 0.008459        | -        | -               | 0.648376    | -               | -        |
| 2-Ketobutyric acid                                      | 1.05703   | 87   | 11.57696 | 0.31729         | 0.998579 | 0               | 0           | 0.401464        | 0.425747 |
| 2-Methyl-1,4-bisbutane                                  | 1.09476   | 73   | 19.6345  | 0.056           | 1.072938 | 1.284276        | -           | 0.247777        | 0.207909 |
| 2-Methylbutane                                          | 1.48247   | 204  | 15.89557 | 0.080455        | -        | -               | 6.087121    | -               | 2.429555 |
| 2-Mono-isobutyryl                                       | 1.27172   | 71   | 0.006078 | 14.51478        | -        | 2.481711        | -           | 0               | -        |
| 2-Propanol                                              | 1.19145   | 52   | 9.413929 | 0.000238        | ∞        | -               | ∞           | -               | 1.079021 |
| 2-propenamide                                           | 1.02199   | 69   | 9.55486  | 0.13855         | 0.9485   | -               | 0.684797    | 0.33397         | 0.972445 |
| 2-Thioacetyl                                            | 1.16252   | 131  | 26.23198 | 0.000874        | 4.545037 | 3.761568        | -           | 3.992819        | -        |
| 3,4-Dihydroxy-5-methyl-dihydrofuran                     | 1.20534   | 85   | 16.61135 | 0.016374        | -        | -               | -           | 0.521982        | -        |
| 3-Aminoisobutyric acid                                  | 1.03666   | 86   | 17.01774 | 0.015792        | -        | -               | 1.080588    | -               | -        |
| 3-βMannobiose                                           | 1.50097   | 129  | 33.50835 | 0.00052         | 0.596111 | 1.184454        | 0.53743     | 1.1642          | 1.092885 |
| 4-Aminobutanoic acid                                    | 1.05568   | 174  | 18.67497 | 0.001044        | 1.626006 | 2.203817        | 1.761739    | -               | 1.49575  |
| 4-Pentenoic acid                                        | 1.34571   | 55   | 13.86202 | 0.001182        | -        | -               | 0.642554    | -               | -        |
| Acrylic acid                                            | 1.34089   | 305  | 24.20714 | 0.000231        | -        | -               | -           | -               | 38.42004 |
| Acrylic acid                                            | 1.46438   | 305  | 24.20714 | 1.63E-05        | -        | -               | 9.050081    | -               | -        |
| Adenine                                                 | 1.16887   | 84   | 23.47097 | 0.060791        | -        | -               | -           | -               | 0.752702 |
| Alanine                                                 | 1.15297   | 86   | 11.30227 | 0.068218        | 0.965867 | 1.148019        | 0.586847    | -               | 0.649488 |
| Aminoacetaldehyde                                       | 1.28474   | 84   | 19.18549 | 0.000527        | -        | -               | -           | -               | 1        |
| Arabinofuranose                                         | 1.23908   | 217  | 30.18196 | 0.004139        | 8.514555 | 101.0743        | 7.555267    | 2.510288        | 6.032124 |
| Benzene                                                 | 1.30428   | 105  | 30.43987 | 0.000377        | 1.080171 | -               | 0.746243    | -               | 0.986584 |

|                                          |         |     |          |                 |          |                 |             |                 |             |
|------------------------------------------|---------|-----|----------|-----------------|----------|-----------------|-------------|-----------------|-------------|
| 3-βMannobiose                            | 1.50097 | 129 | 33.5084  | 0.00052030<br>4 | 0.59611  | 1.18445378      | 0.537430066 | 1.03399         | 1.164200438 |
| Butanoic acid                            | 1.16791 | 105 | 32.85359 | 0.032427        | -        | -               | -           | -               | 2.781613    |
| Citric acid                              | 1.5541  | 67  | 22.80685 | 1.84E-05        | 1.144088 | 1.285405        | 2.076771    | 1.08826         | -           |
| 2-Deoxyribose                            | 1.36672 | 204 | 14.5498  | 0.01607057<br>6 | -        | -               | 0.543393583 | 0.7956127<br>57 | 0.74213     |
| D-(-)-Fructo-<br>furanose                | 2.39593 | 217 | 31.89799 | 8.09E-05        | -        | -               | -           | 0.23425         | -           |
| D-(-)-Fructose                           | 2.20787 | 89  | 23.72675 | 8.17E-05        | -        | -               | 5.77366     | 0               | -           |
| 2-Hydroxyglu-<br>taric acid              | 1.08633 | 85  | 18.5477  | 0.02547150<br>1 | -        | -               | 0.33304287  | 0.0506975<br>31 | -           |
| D-(+)-Galac-<br>turonic acid             | 1.53594 | 204 | 24.62484 | 6.87E-06        | 2.47611  | 1.635795        | -           | -               | -           |
| D-(+)-Trehalose                          | 1.49968 | 361 | 33.25895 | 0.000497        | 0.168103 | -               | 3.403952    | -               | -           |
| 2-Methyl-1,4-<br>bis(trimethyloxy)butane | 1.09476 | 73  | 19.6345  | 0.05599958<br>1 | 1.07294  | 1.28427556<br>4 | -           | 0.2477769<br>2  | 0.20791     |
| D-Gluconic acid                          | 1.49121 | 73  | 25.29977 | 4.8E-06         | 1.775537 | -               | -           | -               | -           |
| L-lysine                                 | 1.30795 | 84  | 18.2183  | 0.03330337<br>9 | -        | -               | -           | -               | 1.60289     |
| Disilane                                 | 1.53404 | 73  | 20.70597 | 0.000257        | 1.291529 | 1.303504        | -           | -               | 1.025083    |
| D-(+)-Turanose                           | 1.16877 | 135 | 31.16345 | 0.04072481<br>5 | -        | -               | 3.403952191 | -               | -           |
| DL-Ornithine                             | 1.13688 | 142 | 0.018848 | 22.76562        | -        | 1.179203        | 0.201221    | -               | 1.114991    |
| D-Lyxose                                 | 1.42005 | 73  | 20.46183 | 0.01147         | -        | -               | -           | 1               | -           |
| D-Mannitol                               | 1.47708 | 319 | 24.40115 | 0.000319        | 1.818926 | 1.789018        | -           | -               | -           |
| N-(4-amino)bu-<br>tyl)acetamide          | 1.40289 | 86  | 14.3285  | 0.00216723<br>1 | -        | -               | -           | -               | 3.21872     |
| 2-Aminoheptane-<br>dioic acid            | 1.6315  | 84  | 21.6216  | 0.00039898<br>3 | -        | -               | -           | 1.193732        | 1.30404     |
| D-Xylopyranose                           | 1.24396 | 73  | 20.5272  | 0.002857        | 1.147197 | 1.404651        | -           | -               | -           |
| D-Xylose                                 | 1.35101 | 204 | 0.003411 | 23.31972        | -        | 10.18715        | 5.072065    | -               | -           |
| Ethane                                   | 1.21401 | 103 | 24.67449 | 0.043297        | -        | -               | -           | 0.126903        | -           |
| Ethanol                                  | 1.16516 | 75  | 15.55067 | 0.011141        | 0.746658 | 0.838336        | 0.642196    | 0.794435        | 0.649199    |
| Ethyl βD-gluco-<br>pyranoside            | 1.37168 | 103 | 28.36369 | 0.001349        | 1.310768 | 1.46125         | -           | -               | 1.126878    |
| Galacto-Hexodi-<br>aldose                | 1.59727 | 89  | 24.58388 | 8.48E-05        | 2.014273 | 1.701365        | -           | 1.231298        | -           |
| Gln-Leu-Arg                              | 1.47604 | 416 | 32.11    | 0.000209        | 1.313884 | 1.785724        | -           | 1.168174        | 1.832601    |
| Glycerol                                 | 1.18459 | 203 | 14.59304 | 0.009117        | -        | -               | 0.527386    | 0.721748        | 0.682495    |
| Glyceryl-glyco-<br>side                  | 1.57621 | 103 | 28.53803 | 0.000513        | 1.592898 | 1.808451        | -           | -               | 1.069888    |
| Glycolic acid                            | 1.80691 | 87  | 2.45E-07 | 11.5817         | -        | ∞               | 7.438813    | -               | -           |
| Hydroxylamine                            | 1.07344 | 119 | 11.65536 | 0.12117         | -        | -               | -           | -               | 0.386774    |
| L-5-Oxoproline                           | 1.6533  | 156 | 2.06E-05 | 18.63411        | -        | 1.550549        | -           | -               | -           |
| Lactic Acid                              | 1.29894 | 87  | 10.53345 | 0.011053        | 1.053966 | -               | 0.536054    | -               | 0.777306    |
| L-Aspartic acid                          | 1.42818 | 73  | 18.47547 | 1.55E-05        | 1.578264 | 1.41351         | -           | 0.719657        | -           |
| L-Glutamic acid                          | 1.32539 | 128 | 19.91577 | 0.001841        | 1.402976 | 1.571477        | -           | -               | 1.252725    |
| L-Lysine                                 | 1.40933 | 128 | 24.06302 | 0.000697        | -        | -               | 0.437525    | -               | -           |
| L-Norvaline                              | 1.23768 | 114 | 13.39086 | 0.004595        | 1.080971 | 1.189563        | 0.597305    | -               | 0.638046    |
| L-Ornithine                              | 1.11485 | 70  | 19.85138 | 0.004059        | -        | -               | 2.36951     | 1.599107        | 2.997885    |
| L-Phenylalanine                          | 1.3668  | 91  | 20.16594 | 0.000141        | 1.338407 | 1.56091         | -           | 0               | 0           |
| L-Proline                                | 1.1689  | 143 | 15.00047 | 0.019086        | -        | -               | 0.437599    | -               | 1.410908    |
| L-Sorbopyranose                          | 1.62078 | 73  | 32.57183 | 0.004587        | -        | -               | 0.222118    | 0.49997         | -           |
| Malic acid                               | 1.04278 | 73  | 17.97557 | 0.017644        | 0.302842 | -               | 0.675167    | 1.046246        | 0.800688    |
| meso-Erythritol                          | 1.44533 | 217 | 0.000907 | 18.32941        | -        | 1.50405         | 1.174095    | 0.580686        | -           |
| Methadone                                | 1.15545 | 105 | 31.86186 | 0.073499        | -        | -               | -           | -               | 0.318151    |
| Methoxyacetic<br>acid                    | 1.37863 | 89  | 21.38958 | 0.069914        | -        | -               | -           | 0.495796        | -           |

|                               |         |     |          |          |          |          |          |          |          |
|-------------------------------|---------|-----|----------|----------|----------|----------|----------|----------|----------|
| Methyl xylopyranoside         | 1.2358  | 204 | 32.34565 | 0.005389 | 1.88299  | 2.196754 | -        | 1.583434 | -        |
| Muscimol                      | 1.14854 | 73  | 17.34786 | 0.036742 | 5.008348 | $\infty$ | 7.387087 | -        | -        |
| N-Formylglycine               | 1.55784 | 73  | 20.15992 | 2.36E-05 | -        | -        | 0        | -        | -        |
| Oxalic acid                   | 1.11056 | 73  | 26.35881 | 0.009028 | 1.351243 | -        | -        | 1.230938 | -        |
| Pentanedioic acid             | 1.25701 | 84  | 19.26835 | 0.000903 | -        | -        | 0.662815 | -        | -        |
| Pentasiloxane                 | 1.60646 | 73  | 12.59265 | 4.92E-05 | 1.911732 | 1.975021 | -        | 1.754133 | 1.569799 |
| Pregna-3,5-dien-20 $\beta$ ol | 1.54027 | 117 | 27.28645 | 0.05605  | -        | -        | -        | 1.921015 | -        |
| Propanoic acid                | 1.28281 | 73  | 28.82706 | 1.52E-06 | 7.027658 | 5.25342  | 0.433753 | 3.664049 | 0.501449 |
| Pyruvaldehyde                 | 1.42576 | 100 | 14.38859 | 0.001168 | -        | -        | 0.39324  | 0.77558  | 0.692534 |
| Silane                        | 1.1442  | 73  | 0.018714 | 26.63692 | -        | 1.520408 | -        | 1.37774  | -        |
| S-Methyl-L-cysteine           | 1.06995 | 211 | 13.54728 | 0.028567 | 0.378942 | -        | -        | -        | -        |
| $\beta$ D-(+)-Mannopyranose   | 1.45422 | 204 | 24.79585 | 7.45E-05 | -        | -        | 3.332321 | -        | -        |
| $\beta$ D-(+)-Talopyranose    | 1.37416 | 73  | 23.96887 | 0.000116 | 1.041925 | -        | 0.363394 | -        | -        |
| $\beta$ D-(+)-Xylopyranose    | 1.49445 | 149 | 23.31341 | 0.000969 | 1.311775 | 0.25001  | 0        | 0.52295  | -        |
| $\beta$ D-Glucopyranose       | 1.39905 | 204 | 23.85569 | 0.000815 | -        | -        | 2.509828 | -        | -        |
| $\beta$ L-Idopyranuronic acid | 1.25716 | 73  | 28.65005 | 0.002731 | -        | -        | 0.517919 | -        | -        |
| $\beta$ N-Formyl-L-lysine     | 1.20366 | 84  | 18.21829 | 0.009274 | -        | -        | 1.97199  | -        | -        |

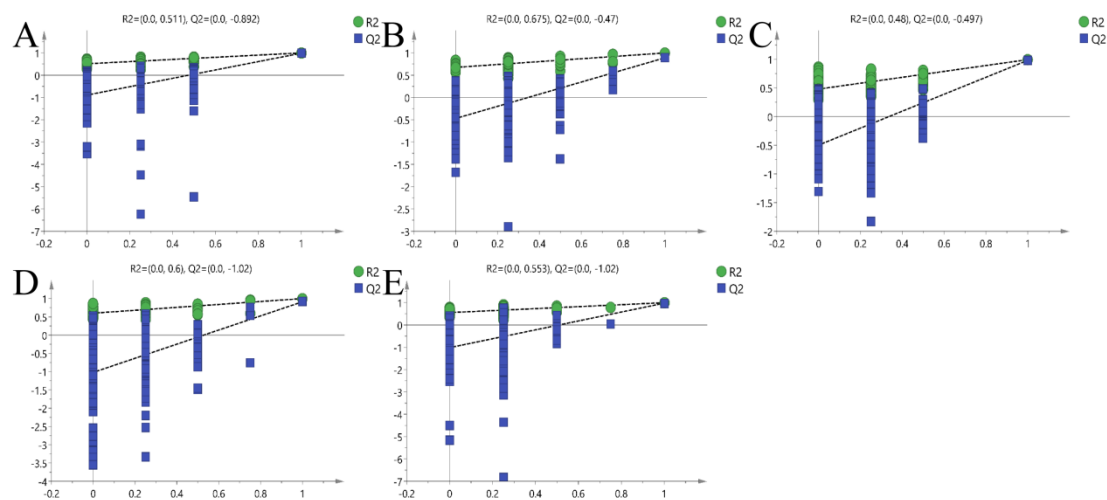

**Figure S1.** Response permutation testing (RPT). RPT is a random ranking method used to evaluate the accuracy of (O)PLS models and avoid supervised learning methods, thus obtaining not accidental classification. (A) CK and F; (B) CK and H; (C) CK and T; (D) CK and D; (E) CK and P. Note: CK, blank control group; F, flutriafol; H, hexaconazole; T, tebuconazole; D, difenoconazole; P, propiconazole.
